# Supplementary material for: DRAM-3 modulates autophagy and promotes cell survival in the absence of glucose
Source: PubMed Central journal article supplement — Cell Death Differ. 2015 May 1;22(10):1714–26. doi: 10.1038/cdd.2015.26 (PMC4563785; doi:10.1038/cdd.2015.26), 2015-05-01
Supplement: cdd201526x1.pdf [file cdd201526x1.pdf]

## Supplementary Figure Legends

### Supplementary Figure 1

**(a-d)** Chemotherapeutic drugs do not induce DRAM-3 in Hep-G2 **(a)**, A549 **(b)**, LNCaP **(c)** or H1299 **(d)** cells. RT-qPCR analysis was performed on cells treated for 24h with Actinomycin D (2 nM), Etoposide (10  $\mu$ M) and Cisplatin (5  $\mu$ M). Each condition was measured in triplicate, and data displayed are means of DRAM-3/18S RNA levels from 3 experiments with the untreated condition (Co) normalised to 1. Error bars are SD.

### Supplementary Figure 2

**(a)** DRAM-3 and WIPI2 do not co-localize. Saos-2 pWZL DRAM-3 cells were with  $\alpha$ -Myc-Tag and  $\alpha$ -WIPI2 antibody for IF analysis. Images were taken with a Zeiss LSM710 microscope with 63x objective. **(b)** Quantification of Immunofluorescence analysis of DRAM-3 and LC3B overlap. Images of Saos-2 pWZL-DRAM-3 cells were taken with a Zeiss LSM710 microscope with 63x objective. Cells with medium overexpression (estimated 25% of the overall population; ~70% show low expression and ~5% high expression) were used for the experiment. Two cells per image in 17 images were analysed using the Zeiss Zen software co-localization tool, after setting appropriate cut-offs. The results are represented as means; ‘overall’ is the average of all cells analysed, while ‘high’ denotes the mean of cells with apparently high co-staining and ‘low’ the mean of cells with apparently low co-staining (1 each picked from each image). Error bars are SD. **(c)** A high proportion of DRAM-3 positive LC3 puncta are localized to autolysosomes/lysosomes. Saos-2 pWZL DRAM-3 cells retrovirally overexpressing EGFP-LC3

were generated and stained with  $\alpha$ -Myc-Tag and  $\alpha$ -LAMP2 antibodies for IF analysis. In control conditions, few LC3 puncta could be observed (data not shown) and so therefore treated cells with 100nM Bafilomycin A to cause autophagosome accumulation. Images were taken with a Zeiss LSM710 microscope using a 63x objective.

### **Supplementary Figure 3**

**(a-b)** DRAM-3 induction does not induce substantial levels of apoptosis. Saos-2 DRAM-3 tet-on cells were subjected to doxycycline treatment for 48h and then analysed for caspase 3 cleavage by western blotting **(a)**. Treatment of cells with TNF and cycloheximide was used as a positive control. **(b)** Cells were also stained with Annexin V and propidium iodide prior to analysis by flow cytometry. Early apoptotic death (PI-/Annexin V+) is shown in the lower right quadrant. Late apoptotic death or necrotic death (PI+/Annexin V+) is shown in the upper right quadrant. **(c)** DRAM-3 expression is attenuated in DRAM-3 Tet-On cells following DRAM-3 activation and 10 days recovery without doxycycline. DRAM-3 inducible cells were subjected to 7 days doxycycline treatment, followed by a 10 day doxycycline-free recovery growth and re-subjection to doxycycline. DRAM-3 induction is markedly attenuated in the second round of doxycycline treatment.

### **Supplementary Figure 4**

**(a-c)** DRAM-3 overexpression affects autophagy in control conditions. Saos-2 cells were subjected to 1,2 and 4h of EBSS starvation (3 experiments). LC3B conversion and p62 were determined by Western blot analysis **(a-c)** and LC3BII/Actin levels were quantified using ImageJ **(right panels)**. **(d-f)**. Quantification of LC3B-II/Actin levels in wild-type (GFP Crispr) and

DRAM-3 Crispr knockout cells following treatment with chloroquine. Quantification of the blots is shown below each blot.

### **Supplementary Figure 5**

**(a)** DRAM-3 disruption does not change early endosome and lysosome appearance. EEA1 antibody was used to visualise early endosomes, and LAMP2 antibody to visualise lysosomes in Saos-2 CRISPR Control and DRAM-3 cells. Immunofluorescence analysis was performed on a Zeiss 710 confocal microscope with 63x objective. **(b)** DRAM-3 overexpression does not affect endocytic uptake of BSA. Saos-2 pWZL and pWZL DRAM-3 were serum- and amino acid-starved (EBSS) for 3h 30min, then BSA (1 mg/ml) was added back for different time points. Western blot analysis was performed to determine the endocytic uptake of BSA. **(c)** Uptake kinetics of **(b)**. The uptake of each time point in the 2 cell lines was quantified from 3 experiments. Values displayed are means, error bars are SD.

### **Supplementary Figure 6**

**(a)** DRAM-3 overexpression protects from Glucose starvation-induced cell death. MDA-MB-231 cells containing pWZL Control and pWZL DRAM-3 constructs were subjected to 24h Glucose starvation (DMEM glucose free + 2% dialyzed FBS). The starvation media was exchanged after 24h and the surviving cells were grown in normal growth media for 3-4 days before staining them for colony formation with Giemsa modified stain. **(b)** Glucose-starvation induced cell death is mainly non-apoptotic. Saos-2 pWZL and pWZL DRAM-3 cells were subjected to 24h Glucose starvation with and without addition of apoptosis inhibitor 50 $\mu$ M z-

Vad-FMK (b). 4  $\mu$ g/ml Cycloheximide (CHX) + 5ng/ml TNF- $\alpha$  (TNF) was used as an apoptosis-inducing positive control. (c) DRAM-3 expressing and vector control cells (pWZL) were treated as indicated and were then stained with Annexin V and propidium iodide prior to analysis by flow cytometry. Early apoptotic death (PI-/Annexin V+) is shown in the lower right quadrant. Late apoptotic death or necrotic death (PI+/Annexin V+) is shown in the upper right quadrant. (d) Crispr knockout of DRAM-3 does not decrease survival following glucose deprivation. Saos-2 control (GFP Crispr) and DRAM-3 Crispr knockout cells were subjected to 24h Glucose starvation (DMEM glucose free + 2% dialyzed FBS). The starvation media was exchanged after 24h and the surviving cells were grown in normal growth media for 3-4 days before staining for colony formation with Giemsa-modified stain. (e) Inhibition of autophagy by treatment with chloroquine does not affect cell death induced by glucose deprivation in either DRAM-3 expressing or vector control cells (pWZL). Cells were stained with Annexin V and propidium iodide prior to analysis by flow cytometry. Early apoptotic death (PI-/Annexin V+) is shown in the lower right quadrant. Late apoptotic death or necrotic death (PI+/Annexin V+) is shown in the upper right quadrant. FACS profiles are representative for 3 experiments.

### **Supplementary Figure 7**

DRAM-3 overexpressing cells show greater LC3B-II levels in control and glucose-starvation conditions. Saos-2 pWZL and pWZL DRAM-3 cells were subjected to 24h Glucose starvation (DMEM glucose free + 2% dialyzed FBS) and then analysed for LC3B conversion by western blotting. 3 experiments were quantified using ImageJ and the results were plotted as means of LC3BII/Actin levels, error bars are SEM.

## **Supplementary Figure 8**

*DRAM-3* is amplified in a number of tumour types. Using publically available datasets in cBioPortal ([www.cBioPortal.org](http://www.cBioPortal.org)), *dram-3* genetic alterations were mapped in a range of cancer types.
