# Supplementary material for: DRAM-3 modulates autophagy and promotes cell survival in the absence of glucose
Source: PubMed Central journal article supplement — Cell Death Differ. 2015 May 1;22(10):1714–26. doi: 10.1038/cdd.2015.26 (PMC4563785; doi:10.1038/cdd.2015.26), 2015-05-01

# Supplementary Figure 6

**A** DMEM no glucose +2% dialized serum

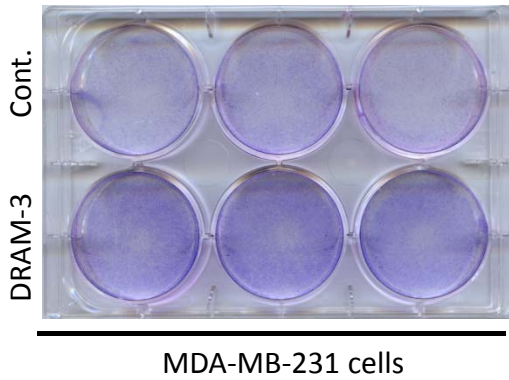

**B** Saos-2 pWZL DRAM-3 Glucose starvation

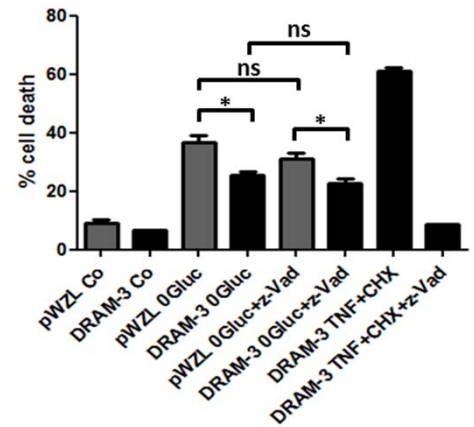

**C**

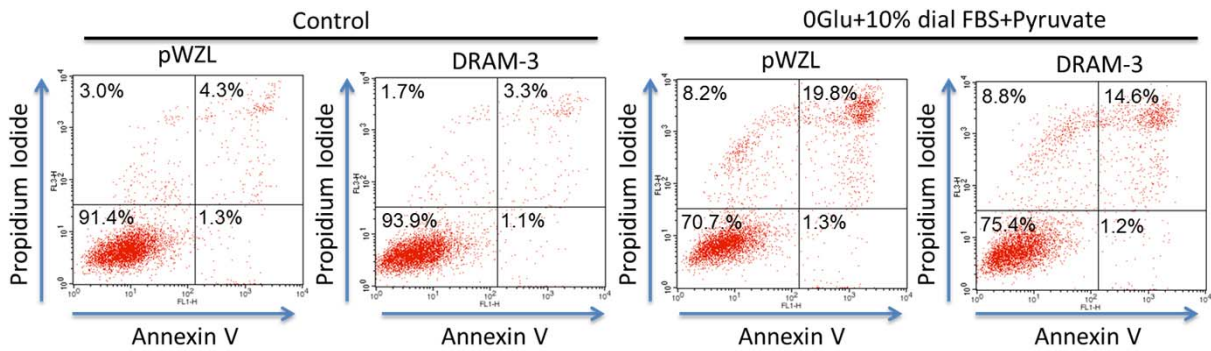

**D** DMEM no glucose + 2% dialized serum

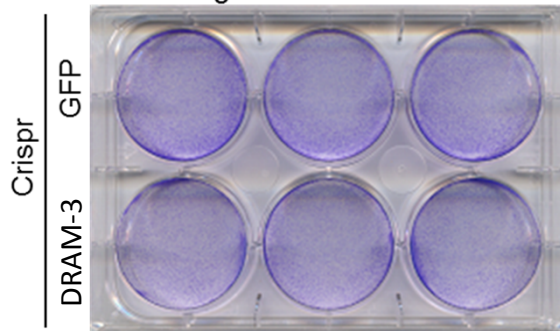

**E**

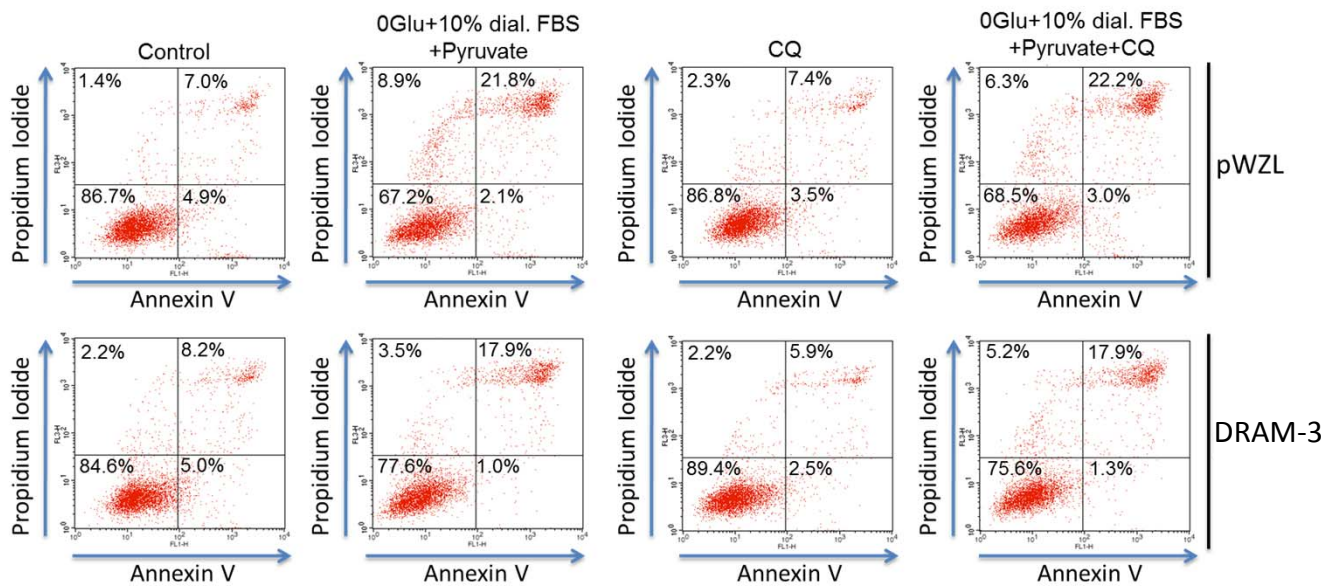

Supplement: cdd201526x7.pdf [file cdd201526x7.pdf]
