# Supplementary figures and images for: DRAM-3 modulates autophagy and promotes cell survival in the absence of glucose
Source: PubMed Central journal article supplement — Cell Death Differ. 2015 May 1;22(10):1714–26. doi: 10.1038/cdd.2015.26 (PMC4563785; doi:10.1038/cdd.2015.26), 2015-05-01

# Supplementary Figure 4

**A**

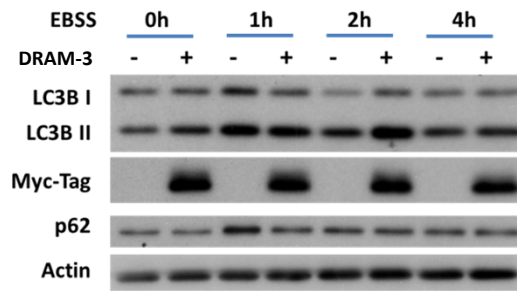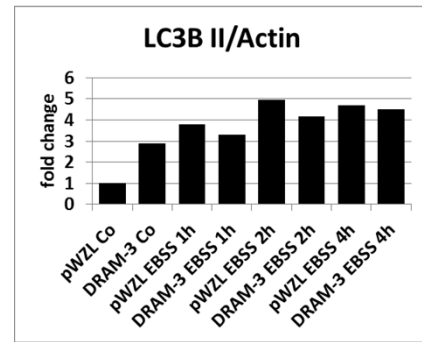

**B**

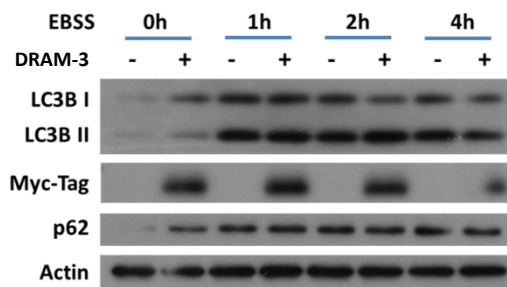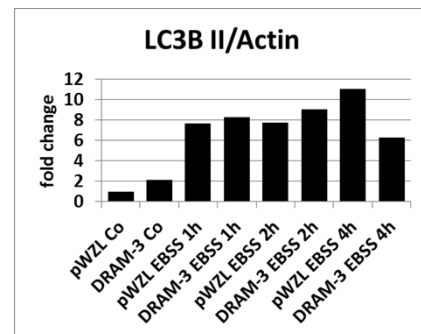

**C**

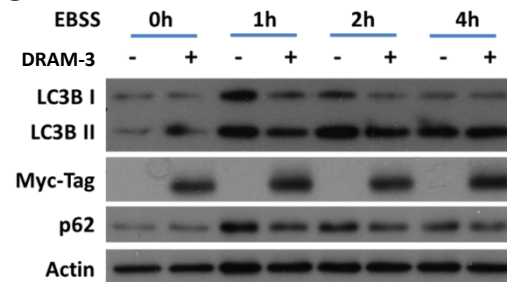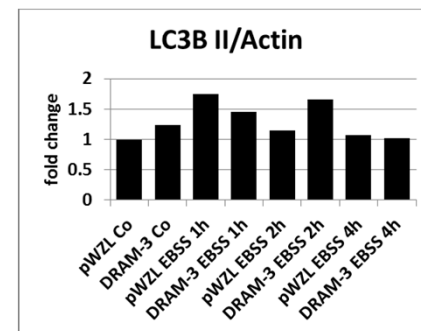

**D**

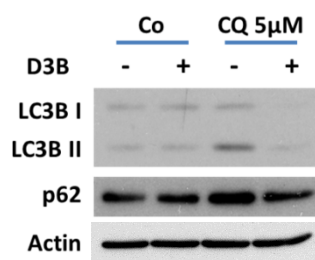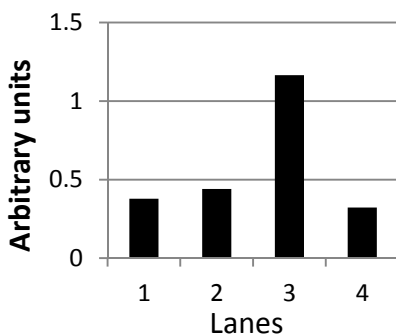

**E**

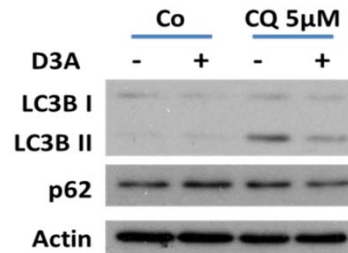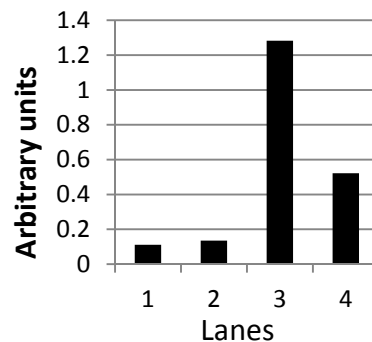

**F**

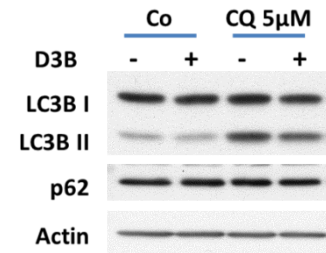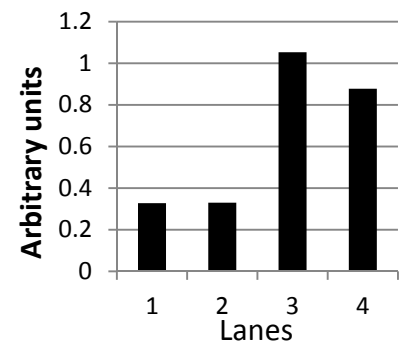

Supplement: cdd201526x5.pdf [file cdd201526x5.pdf]

Supplementary Figure 5

**A**

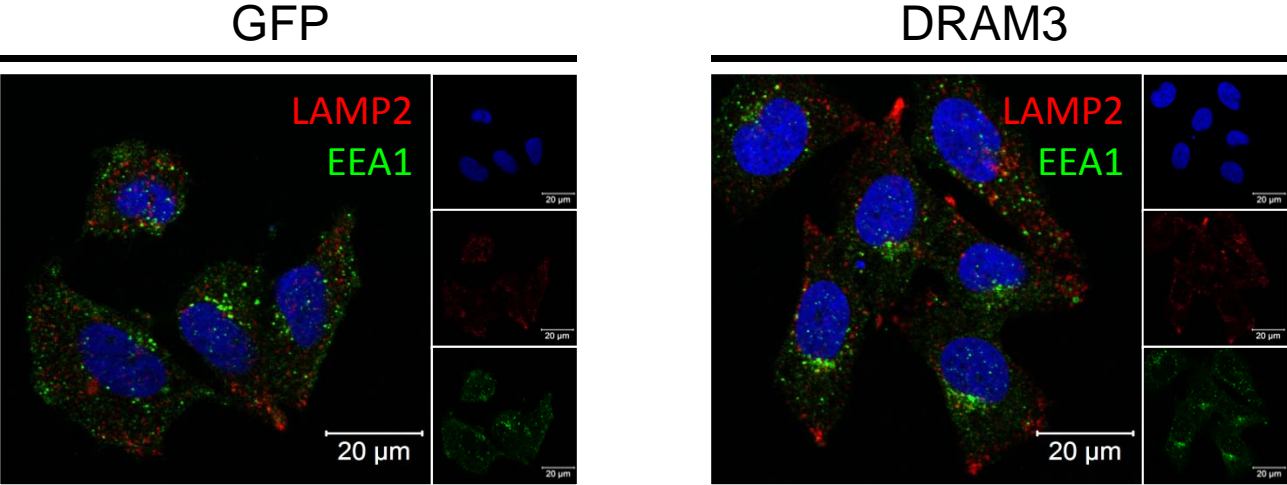

**B**

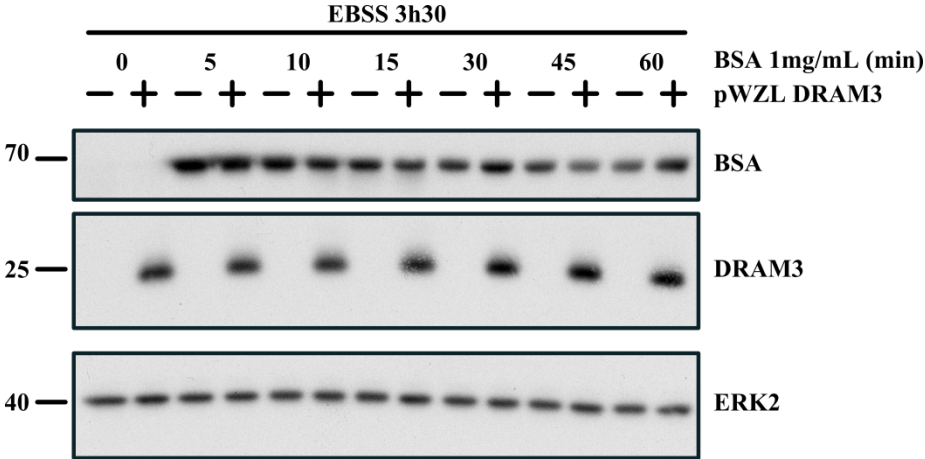

**C**

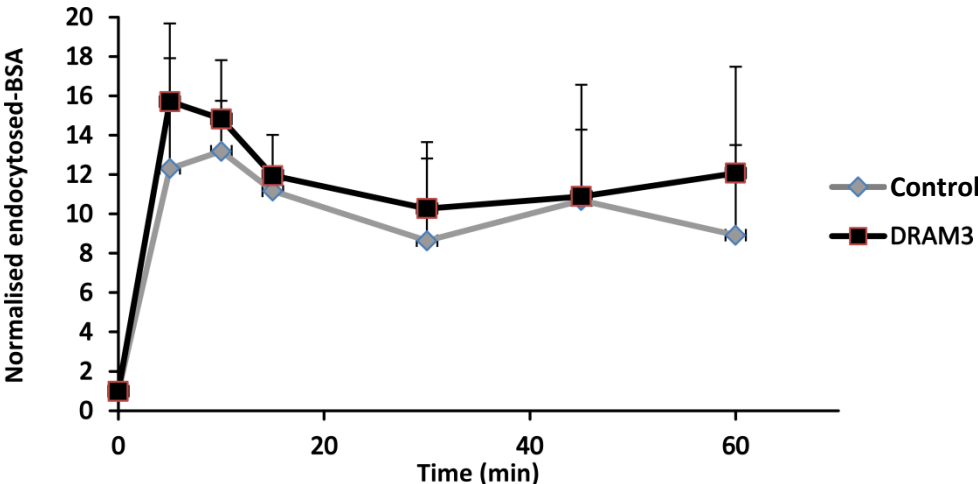

Supplement: cdd201526x6.pdf [file cdd201526x6.pdf]

# Supplementary Figure 8

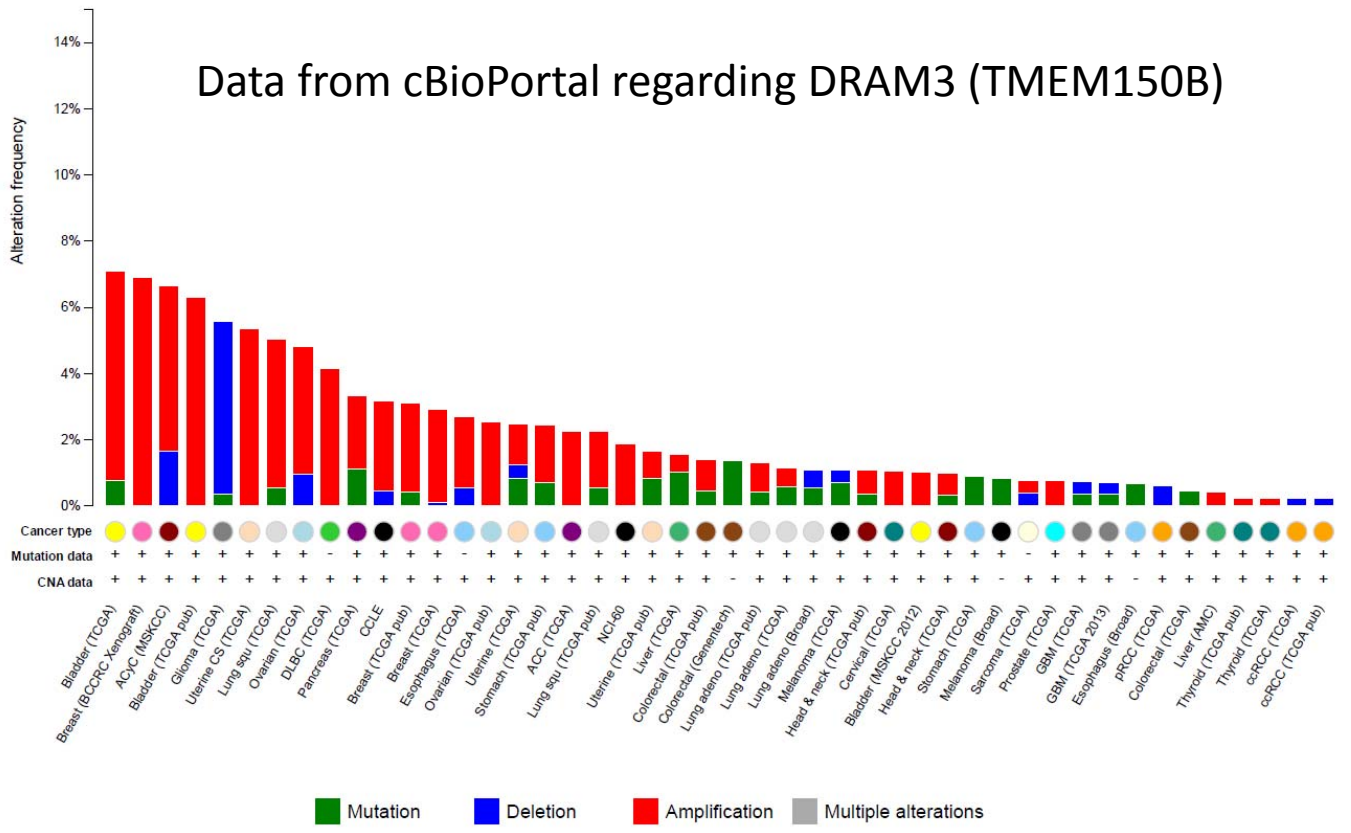

Supplement: cdd201526x9.pdf [file cdd201526x9.pdf]
